# Supplementary material for: The memristive implementation of the hippocampus: A hypothesis
Source: Research Square preprint supplement (doi:10.21203/rs.3.rs-6589367/v1), 2025-05-13
Supplement: Supplementary file 1 [file 87e3ec3a3943d4e4e38adc7a.pdf]

## Supporting Information

# The memristive implementation of the hippocampus: A hypothesis

Dominik Caus<sup>1</sup>, Andrzej Sławek<sup>2</sup>, Tomasz Mazur<sup>2</sup>, Piotr Zawal<sup>2</sup>, Bogusław Baś<sup>1</sup>, Konrad Szaciłowski<sup>2,3\*</sup>, Max Talanov<sup>4,5\*</sup>, and Gisyia Abdi<sup>2\*</sup>

\*Corresponding authors: szacilow@agh.edu.pl, konrad.szacilowski@uwe.ac.uk, max.talanov@gmail.com, agisya@agh.edu.pl

<sup>1</sup>Faculty of Materials Science and Ceramics, AGH University of Krakow, Mickiewicza 30, 30-059 Kraków, Poland

<sup>2</sup>Academic Centre for Materials and Nanotechnology, AGH University of Krakow, Mickiewicza 30, 30-059 Kraków, Poland

<sup>3</sup>Unconventional Computing Laboratory, University of the West of England, Coldharbour Lane, Bristol BS16 1QY, UK

<sup>4</sup>University of Messina, Messina, Italy

<sup>5</sup>Institute for Artificial Intelligence R&D of Serbia, Novi Sad, Serbia

May 4, 2025

Table S1: ON/OFF ratio for different antisolvent samples

| antisolvent   | LRS/HRS ratio                                     |
|---------------|---------------------------------------------------|
| ethyl acetate | $I_{\text{LRS}}/I_{\text{HRS}} = 1.1/0.85 = 1.29$ |
| diethyl ether | $I_{\text{LRS}}/I_{\text{HRS}} = 3.1/1.9 = 1.63$  |
| chlorobenzene | $I_{\text{LRS}}/I_{\text{HRS}} = 0.7/0.35 = 2$    |

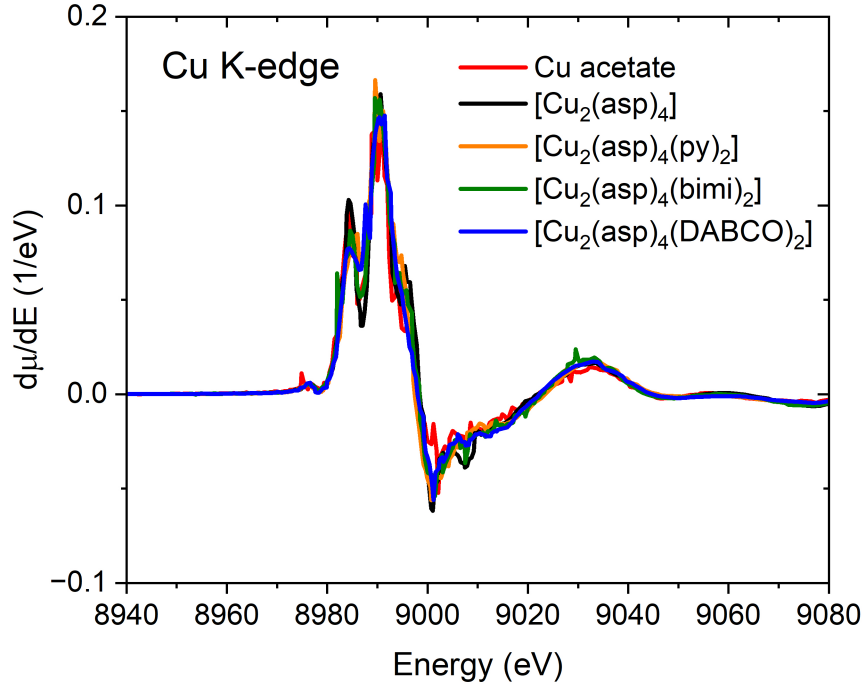

Figure S1: The first derivative of the Cu K-edge XANES spectra for the studied copper aspirinate complexes and copper acetate monohydrate reference with respect to energy.

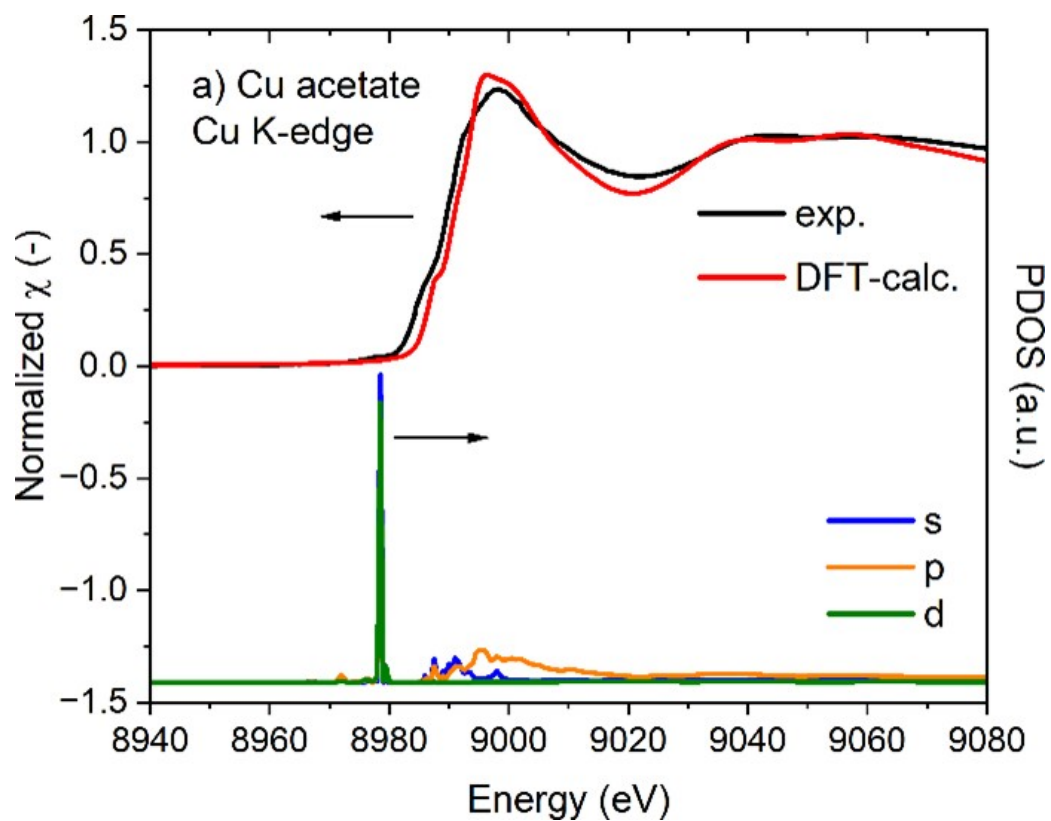

Figure S2: Experimental (black) and DFT-calculated (red) XAS spectra for copper (II) acetate monohydrate at Cu K-edge. The projected density of the states projected on the absorbing Cu atom is plotted on the right y-axis.

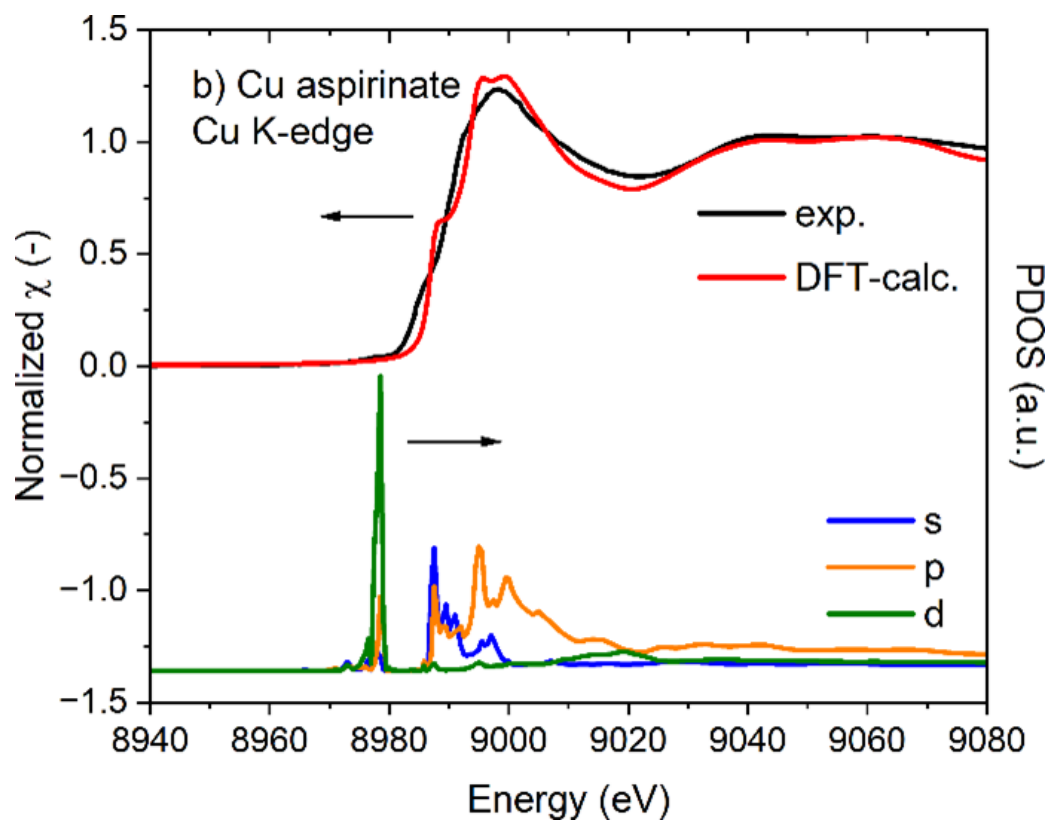

Figure S3: Experimental (black) and DFT-calculated (red) XAS spectra for copper (II) acetate monohydrate at Cu K-edge. The projected density of the states projected on the absorbing Cu atom is plotted on the right y-axis.

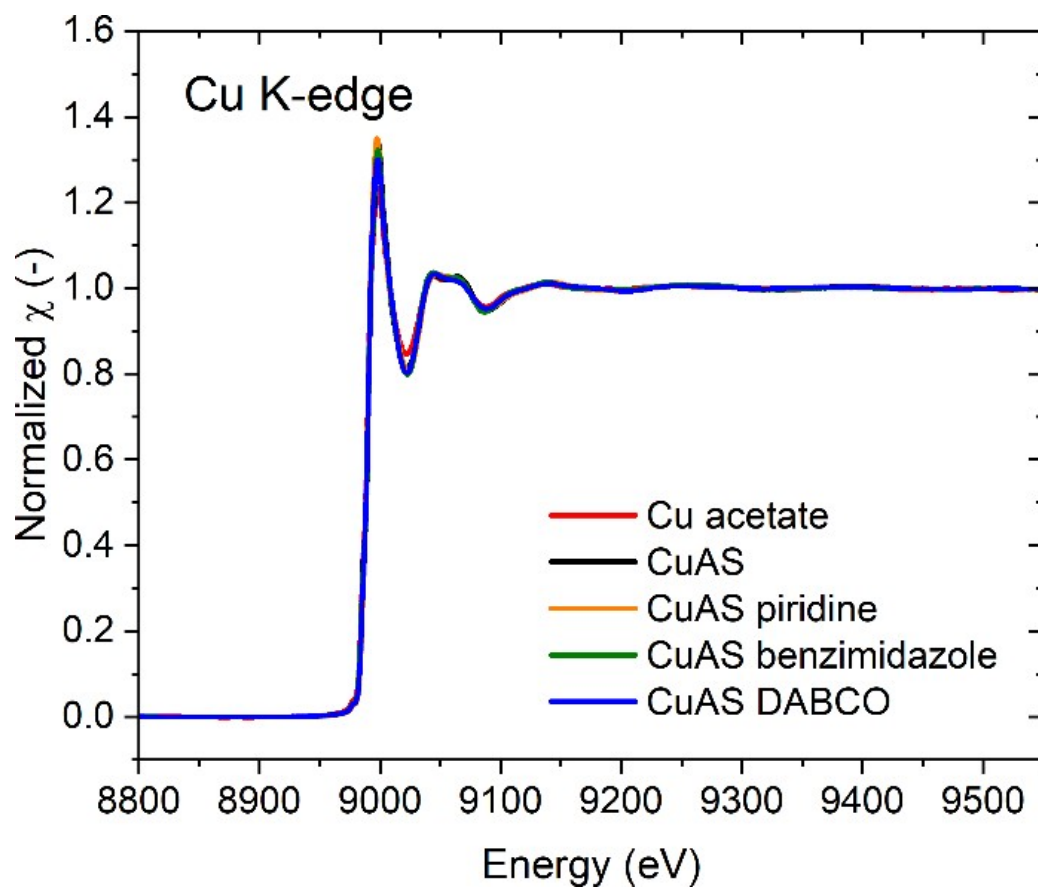

Figure S4: Cu K-edge XAS spectra for the studied copper aspirinate complexes and copper acetate monohydrate reference.

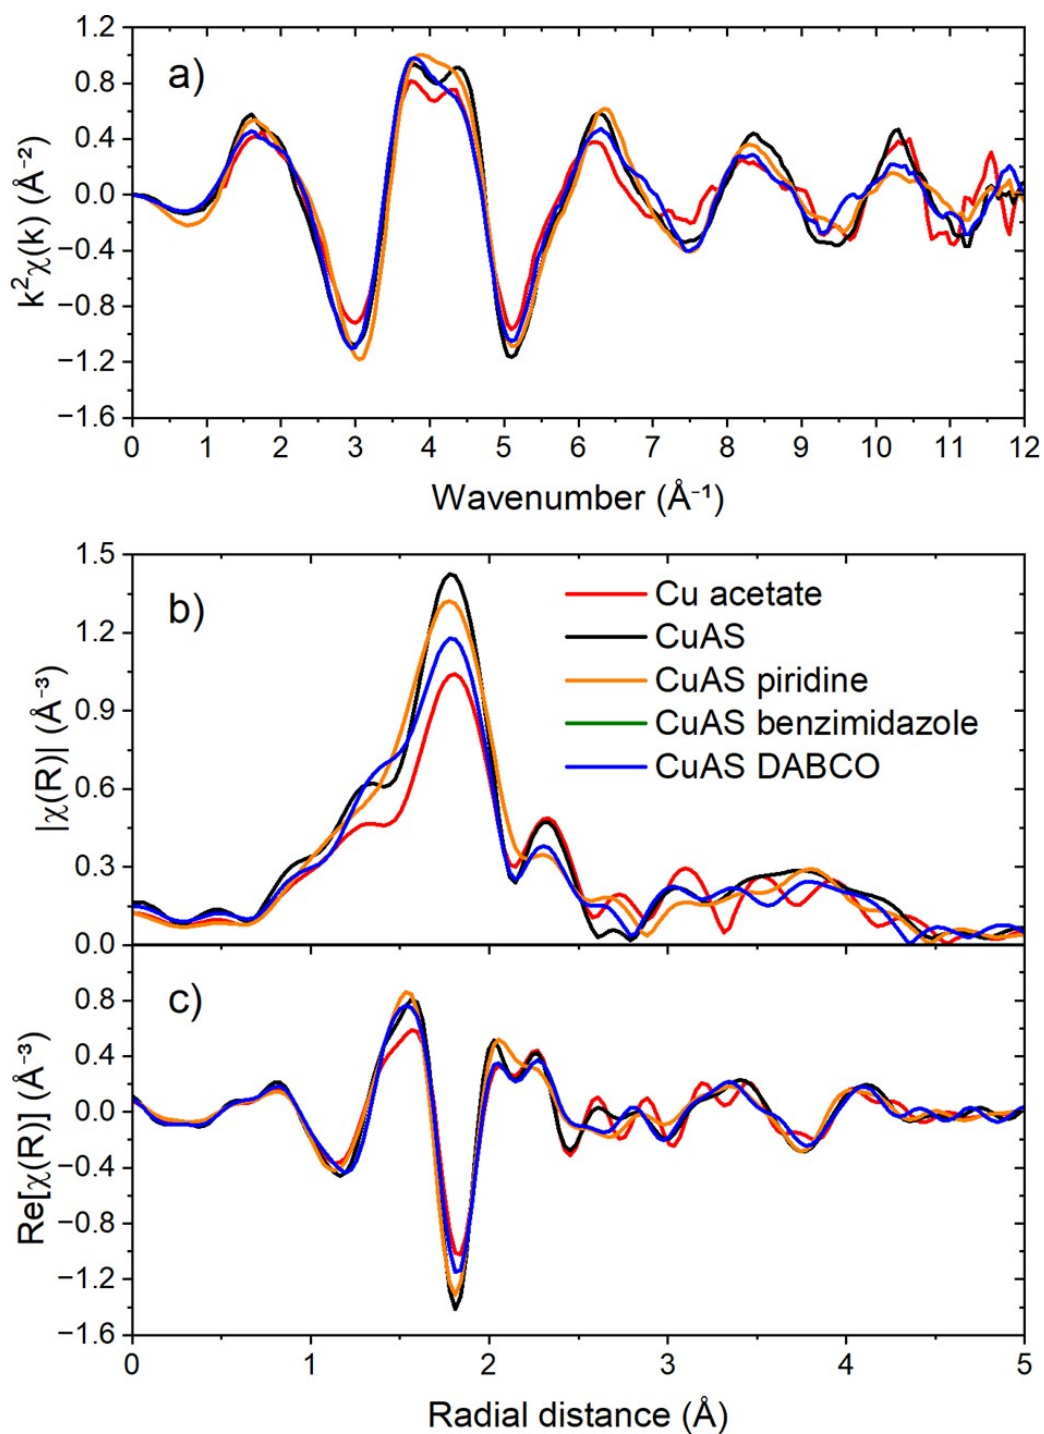

Figure S5: Cu K-edge EXAFS for the references are presented as  $\chi(k)k^2$  in k-space (top) and after Fourier transform in R-space (bottom).

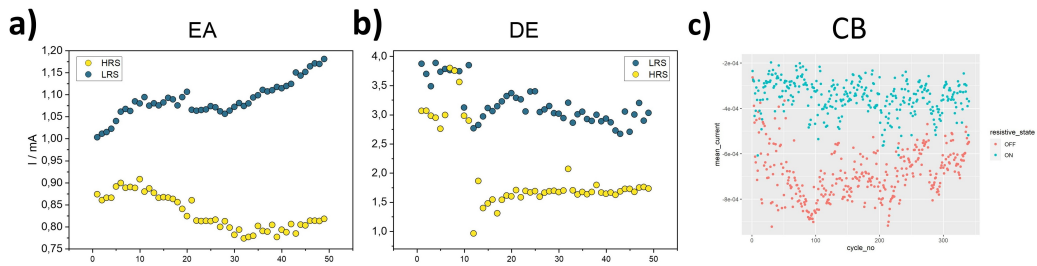

Figure S6: ON/OFF ratio for the antisolvent-based samples: a) ethyl acetate (EA), b) diethyl ether (DE) and c) chlorobenzene (CB). Samples were switched with switching voltage of  $\pm 2$  V with the following reading pulses of  $+500$  mV. Mean values of electric current in states ON (LRS) and OFF (HRS) were measured and used in further analysis.

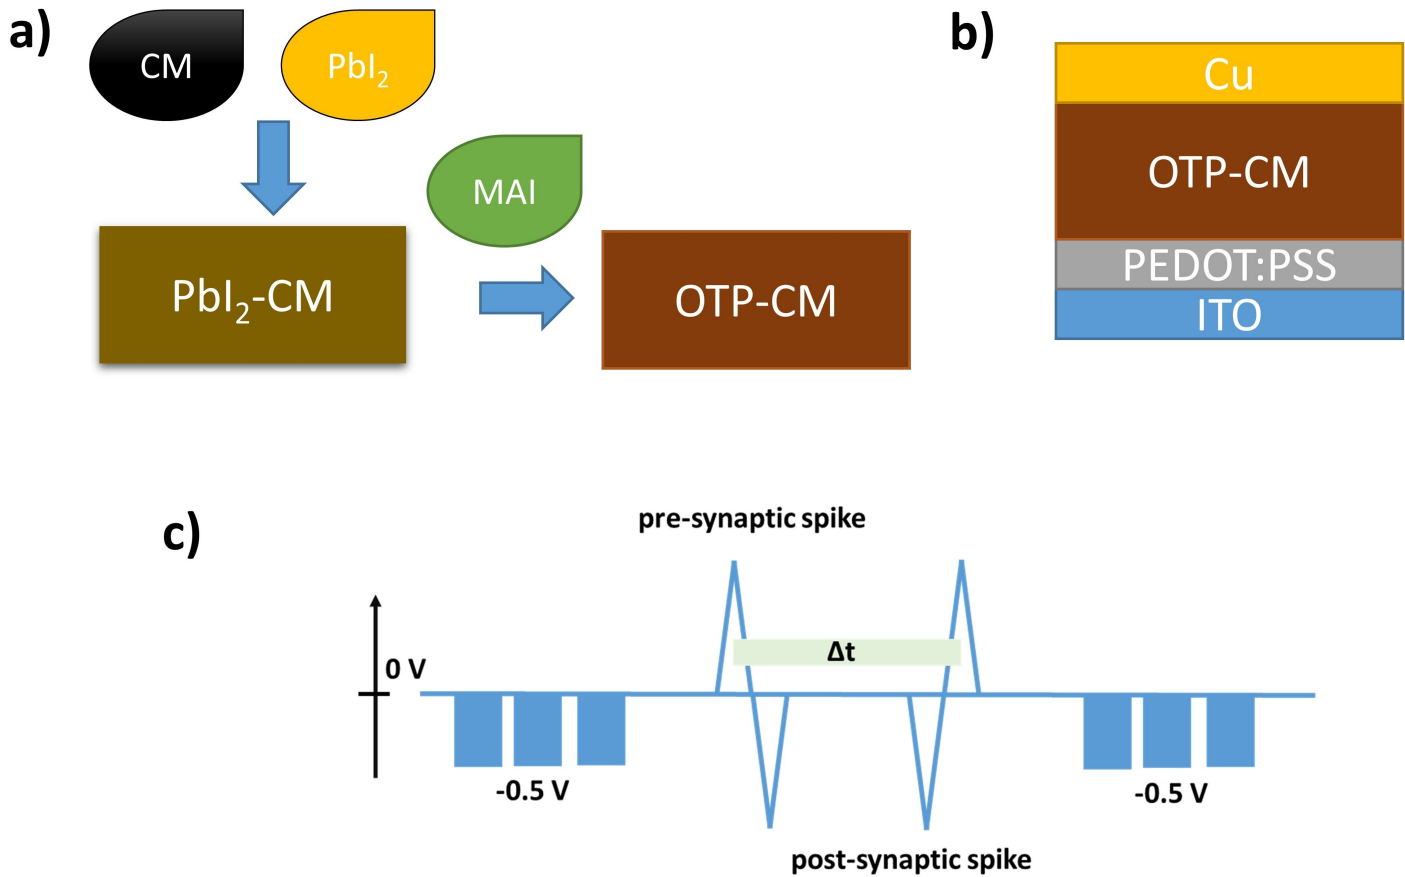

Figure S7: a) device preparation scheme –incorporation of carbon material additives into the  $\text{PbI}_2$  layer and further synthesis of the modified perovskite samples. B) Device architecture – ITO as bottom electrode and Cu as top electrode. C) Spike time-dependent plasticity voltage profile of the experiment for the potentiation part – where the post-synaptic pulse happens after  $\Delta t$  after pre-synaptic pulse.
